# Supplementary material for: Visualization of the distribution of carbendazim on the arabidopsis leaf surface by VUV-postionization mass spectrometry
Source: Royal Society of Chemistry journal article supplement (doi:10.1039/d5ay01242b), 2025-12-16
Supplement: d5ay01242b1.pdf [file d5ay01242b1.pdf]

## Supplementary Information for:

### Visualization the Distribution of Carbendazim on Arabidopsis Leaf Surface by VUV-Postionization Mass Spectrometry

Wuyi Nie,<sup>a</sup> Anan Li,<sup>a</sup> Xueqing Shang,<sup>a</sup> Qiao Lu <sup>\*a,b</sup> and Yongjun Hu <sup>\*a</sup>

*a MOE Key Laboratory of Laser Life Science & Institute of Laser Life Science,  
Guangdong Provincial Key Laboratory of Laser Life Science, Guangzhou Key Laboratory  
of Spectral Analysis and Functional Probes, College of Biophotonics, South China  
Normal University, Guangzhou 510631, China*

*b Department of Laboratory Medicine, Taihe Hospital and Hubei Key Laboratory of  
Wudang Local Chinese Medicine Research, Hubei University of Medicine, Shiyan  
442000, China.*

*E-mail: qiaolu@hbmh.edu.cn; yjhu@scnu.edu.cn*

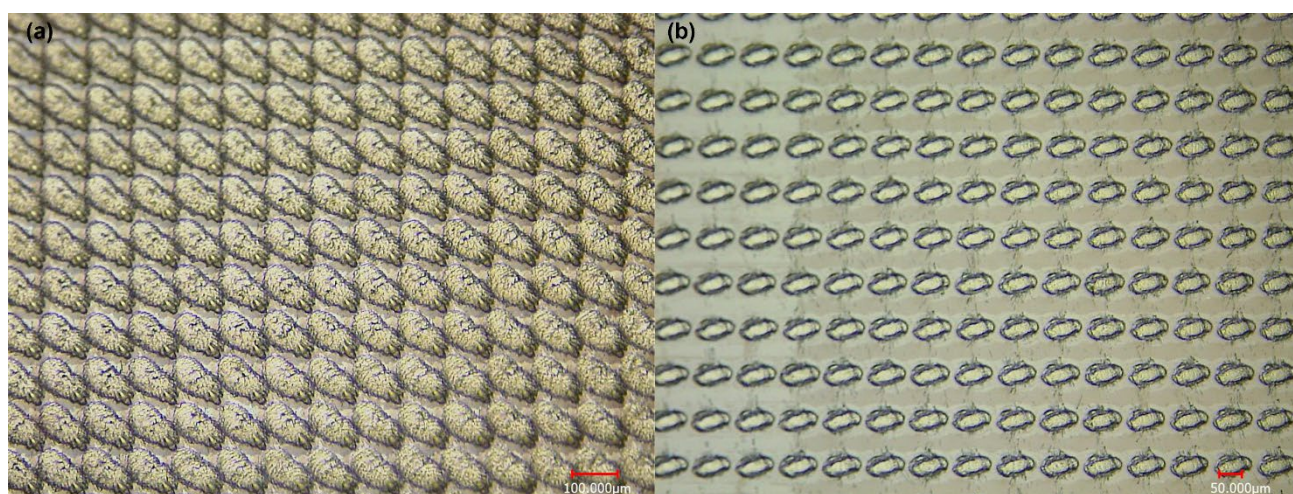

Figure S1. Optical microscope image of a laser ablation crater. The scanning step size is (a)100 µm; (b)50 µm.

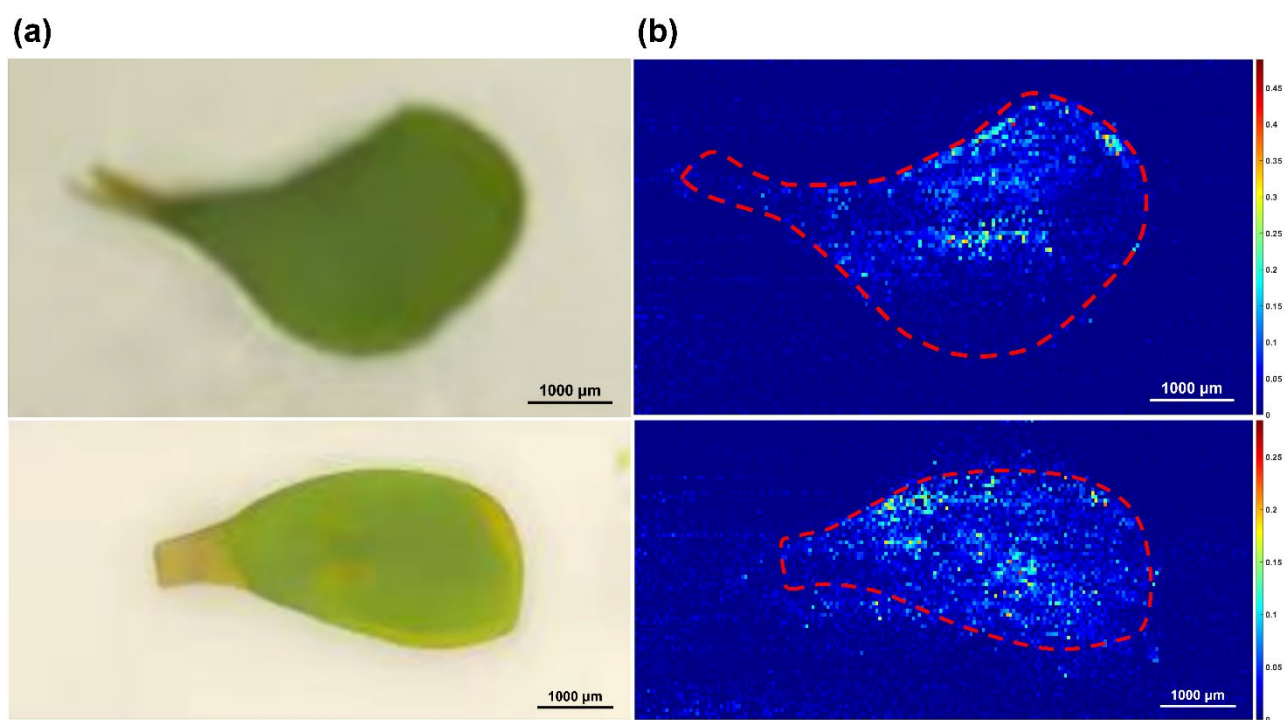

Figure S2. Image analysis of residual carbendazim on leaf surface after the carbendazim was sprayed on the leaf. (a) The optical images of leaf, (b) corresponding mass spectrometry images of carbendazim.
